# Supplementary material for: Infection and Transmission of Rift Valley Fever Viruses Lacking the NSs and/or NSm Genes in Mosquitoes: Potential Role for NSm in Mosquito Infection
Source: PLoS Negl Trop Dis. 2012 May 1;6(5):e1639. doi: 10.1371/journal.pntd.0001639 (PMC3341344; doi:10.1371/journal.pntd.0001639)
Supplement: Table S1 — Aedes aegypti statistical analysis results for data in Table 2 . (XLS) [file pntd.0001639.s001.xls]

## Sheet: Titers
Table S1. Aedes aegypti statistical analysis results for data in Table 2
	Infection rate				Dissemination rate (exposed)				Dissemination rate (infected)				Transmission rate (exposed)				Transmission rate (disseminated)
Virus comparison	LOR1	Lower 95% CL2	Upper 95% CL	P3	Diff4	Lower 95% CL	Upper 95% CL	P	Diff	Lower 95% CL	Upper 95% CL	P	Diff	Lower 95% CL	Upper 95% CL	P	Diff	Lower 95% CL	Upper 95% CL	P
rRVF-ΔNSs vs. rRVF-wt	1.26	-0.49	3.01	0.31	-30.38	-47.6144	-10.699	0.0002761	-40	-61.7231	-10.3381	0.006028	-13.55	-40.1467	14.8	0.3232	-8.33	-40.7324	24.0593	0.6815
rRVF-ΔNSm vs. rRVF-wt	-3.46	-5.05	-1.87	0	-67.97	-79.9607	-52.8601	0	-70	-91.7876	-17.6327	0.005477	-45.83	-65.9571	-26.5024	6.654e-10	16.67	-70.6532	43.5811	1
rRVF-ΔNSs-ΔNSm vs. rRVF-wt	-5.46	-9.57	-1.34	0	-68.75	-80.6207	-53.7769	0	na5	na	na	na	-46.88	-66.91	-27.7799	5.676e-08	na	na	na	na
1 LOR = log odds ratio, adjusted for day-0 input titers
2 CL = confidence limit
3 P = p-value
4 Diff=Difference in percent positive
5 na = not applicable

## Sheet: Rates
Table S2. Aedes aegypti statistical analysis results for data in Table 1
	Dissemination rate (exposed)				Dissemination rate (infected)				Transmission rate (exposed)				Transmission rate (disseminated)
Virus comparison	Diff1	Lower 95% CL2	Upper 95% CL	P3	Diff	Lower 95% CL	Upper 95% CL	P	Diff	Lower 95% CL	Upper 95% CL	P	Diff	Lower 95% CL	Upper 95% CL	P
rRVF-ΔNSs vs. rRVF-wt	-30.38	-47.6144	-10.699	0.0002761	-40	-61.7231	-10.3381	0.006028	-13.55	-40.1467	14.8	0.3232	-8.33	-40.7324	24.0593	0.6815
rRVF-ΔNSm vs. rRVF-wt	-67.97	-79.9607	-52.8601	0	-70	-91.7876	-17.6327	0.005477	-45.83	-65.9571	-26.5024	6.654e-10	16.67	-70.6532	43.5811	1
rRVF-ΔNSs-ΔNSm vs. rRVF-wt	-68.75	-80.6207	-53.7769	0	na4	na	na	na	-46.88	-66.91	-27.7799	5.676e-08	na	na	na	na
1 Diff=Difference in percent positive
2 CL = confidence limit
3 P = p-value
4 na = not applicable
